# Supplementary material for: Lipid Aging Clocks as predictive and prognostic biomarker in cancer and inflammaging
Source: bioRxiv or medRxiv preprint supplement (doi:10.1101/2024.09.03.24311998), 2024-09-04
Supplement: Supplementary file [file media-1.pdf]

## **Supplementary Information:**

### **Lipid Aging Clocks as predictive and prognostic biomarker in cancer and inflammaging**

Authors: Maximilian Unfried<sup>1,2\*\*</sup>, Amaury Cazenave-Gassiot<sup>2,3,4</sup>, Evelyne Bischof<sup>5,6,7</sup>, Michal Holcapek<sup>8</sup>, Morten Scheibye-Knudsen<sup>9</sup>, Markus R. Wenk<sup>2,3,4,10</sup>, Jan Gruber<sup>1,11\*\*</sup>, Brian K. Kennedy<sup>1,2,12\*\*</sup>

1 Healthy Longevity Translational Research Program, Yong Loo Lin School of Medicine, National University of Singapore, Singapore

2 Department of Biochemistry, Yong Loo Lin School of Medicine, National University of Singapore, Singapore 117608, Singapore

3 Singapore Lipidomics Incubator, Life Sciences Institute, National University of Singapore, Singapore 117456, Singapore

4 Precision Medicine Translational Research Program, Yong Loo Lin School of Medicine, National University of Singapore, Singapore

5 Department of Medical Oncology, Renji Hospital, School of Medicine, Shanghai Jiao Tong University, Shanghai, China

6 Shanghai University of Medicine and Health Sciences, Shanghai, China

7 Sheba Longevity Center, Sheba Medical Center, Tel Aviv, Israel

8 Department of Analytical Chemistry, Faculty of Chemical Technology, University of Pardubice, , 53210 Pardubice, Czech Republic

9 Department of Cellular and Molecular Medicine, University of Copenhagen, Denmark

10 College of Health and Life Sciences, Hamad Bin Khalifa University, Qatar

11 Science Divisions, Yale-NUS College, Singapore 138527, Singapore

12 Department of Physiology, Yong Loo Lin School of Medicine, National University of Singapore, Singapore 117608, Singapore

\*\* Corresponding Author

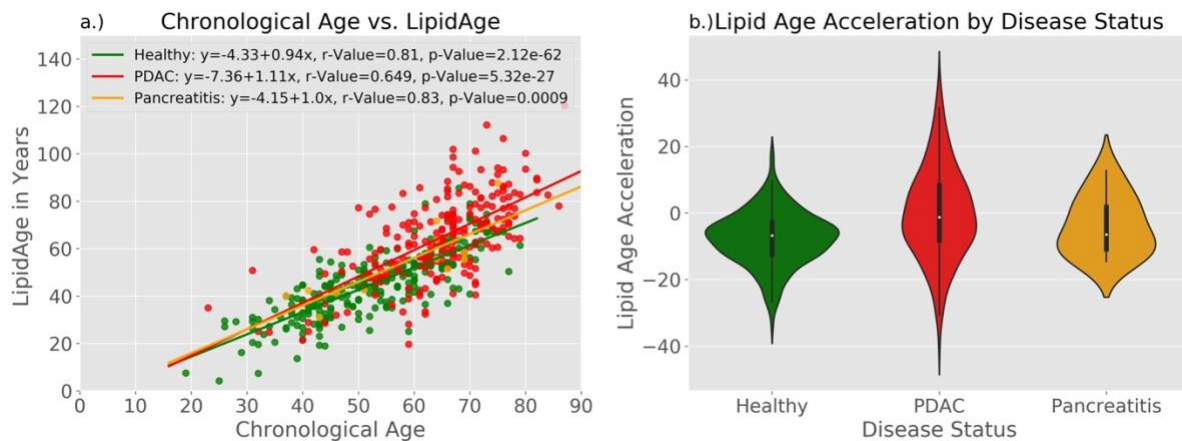

Sup. Figure 1: Uncentered results

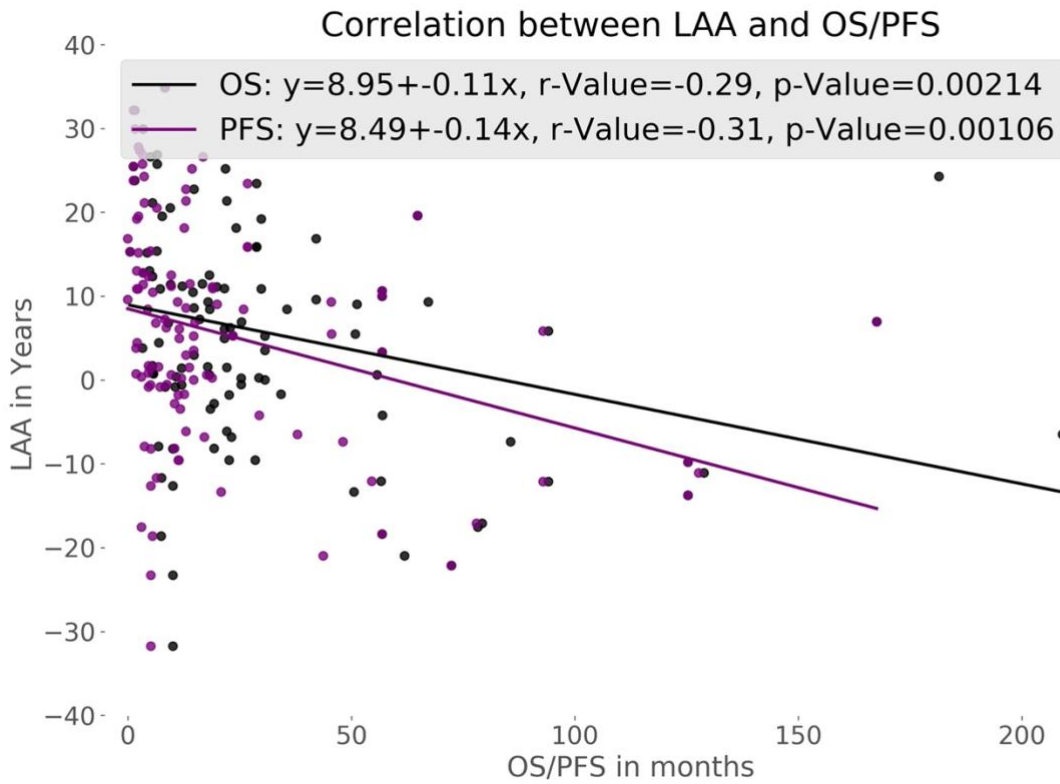

Sup. Figure 2: Correlation between LAA and Overall and Progression free survival

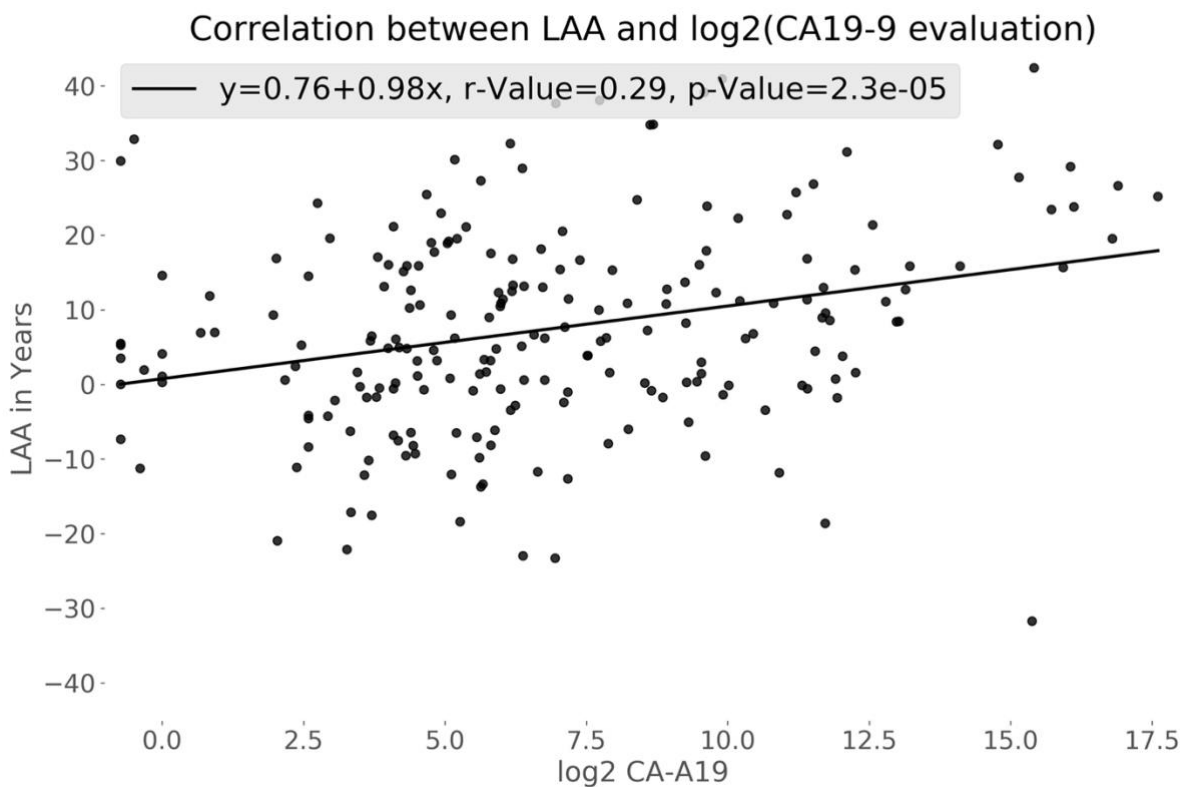

Sup. Figure 3: Correlation between log<sub>2</sub> CA19-9 and LAA

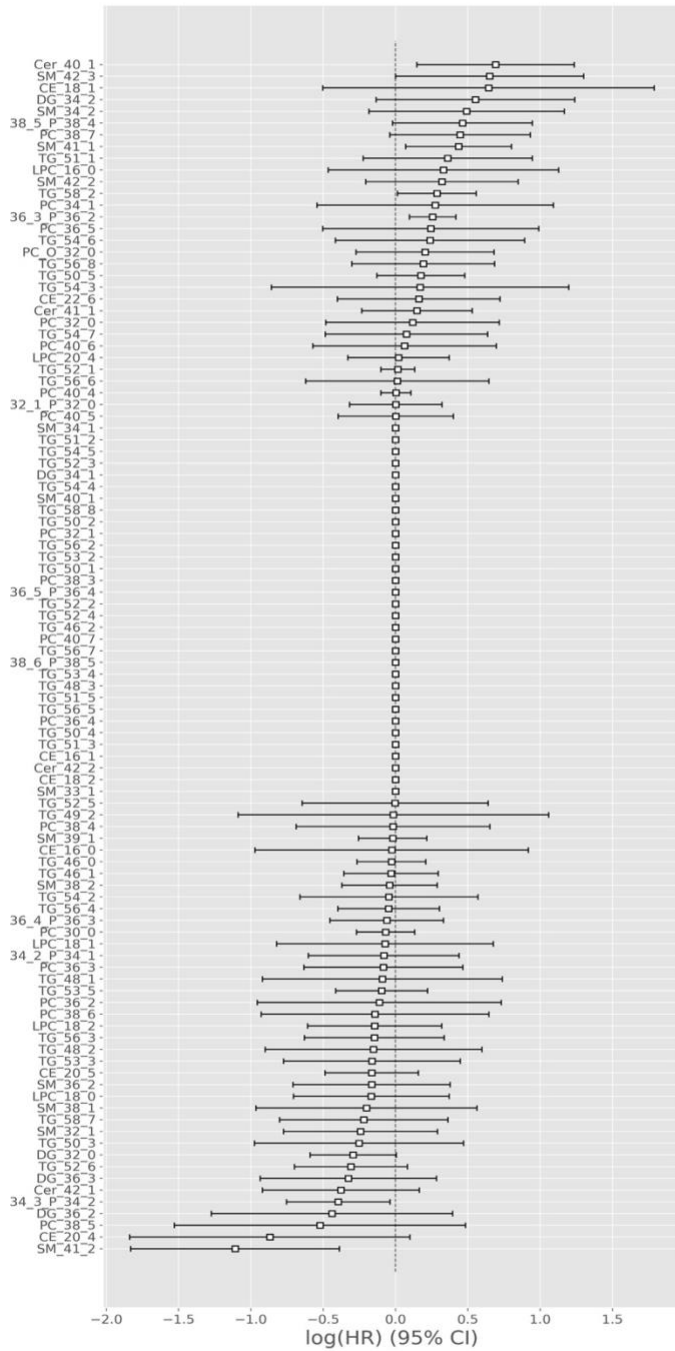

Sup. Figure 4: Lipid Species in the LipidClock and their Hazard Ratios.

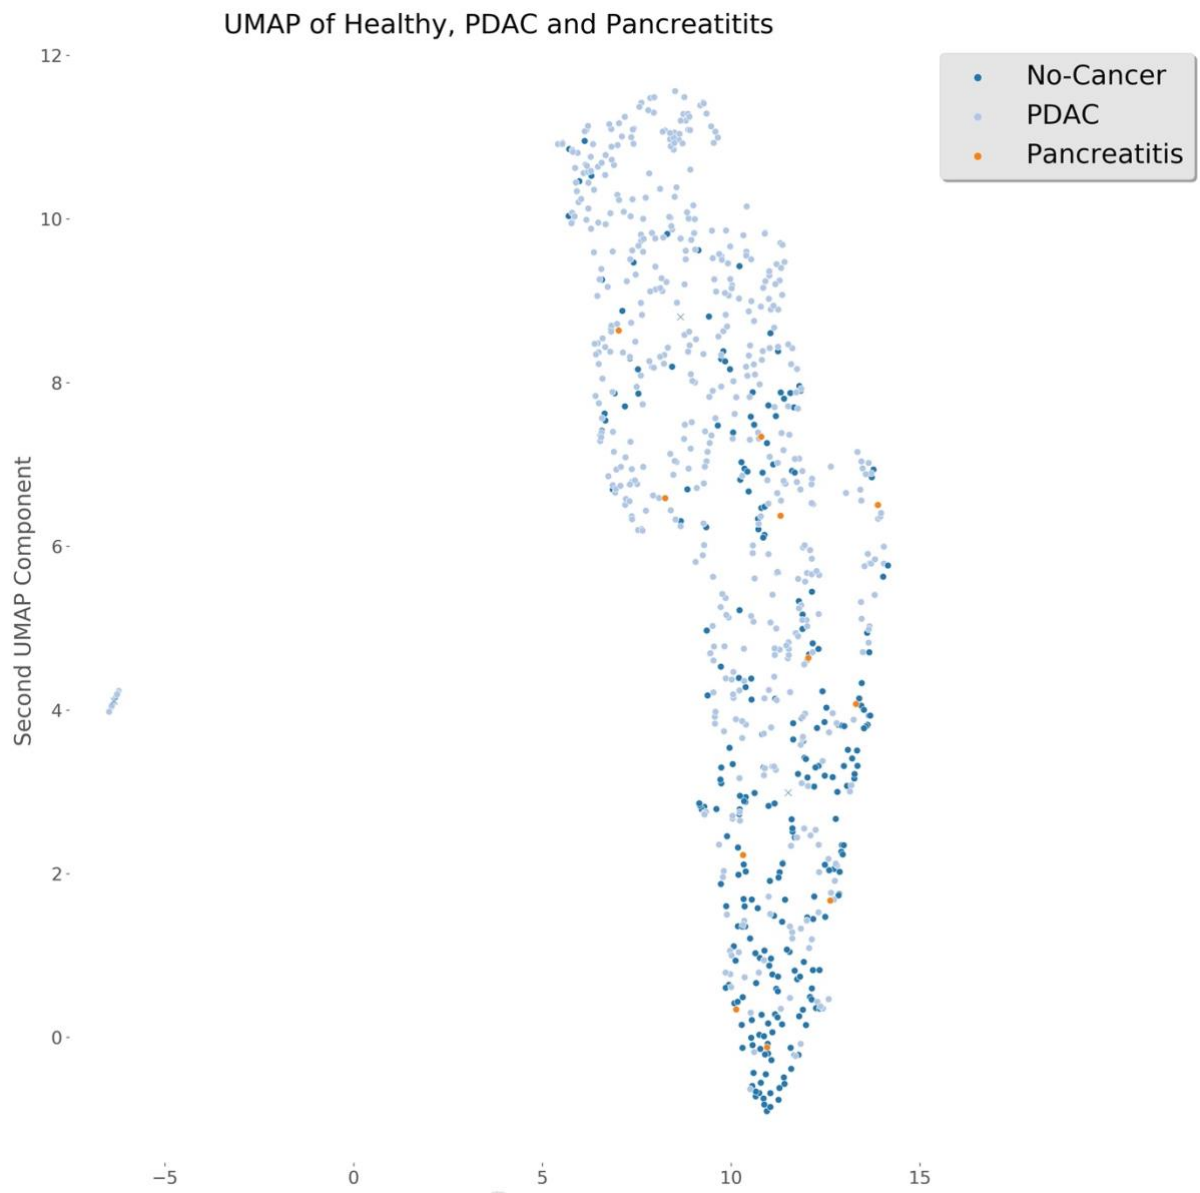

Sup. Figure 5: Separation by the 7 lipids with the largest HR

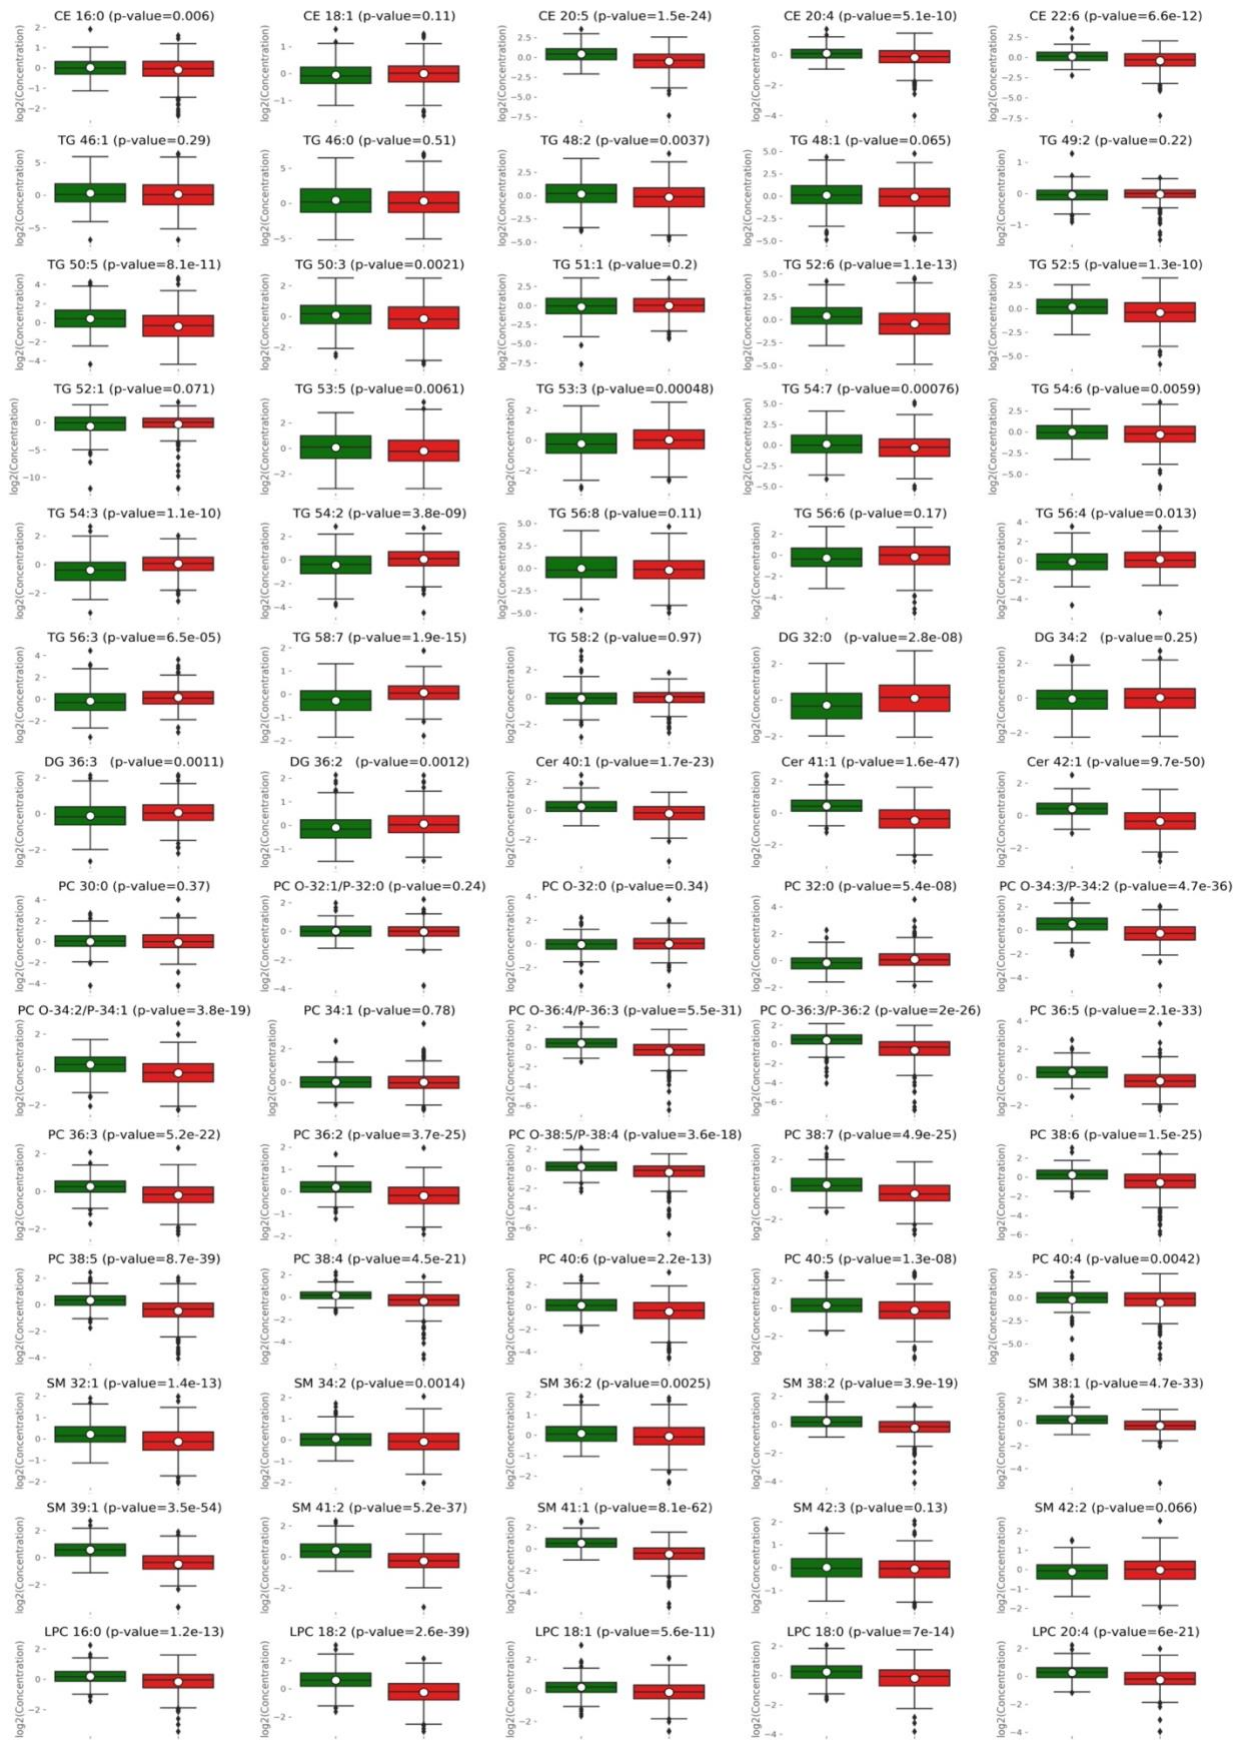

Sup. Figure 6: Difference of lipid species between healthy and PDAC

Sup. Table 1: Metrics on validation Data

|             | Mean<br>Absolute Error | Median<br>Absolute Error | Mean Squared<br>Error | R2-Score |
|-------------|------------------------|--------------------------|-----------------------|----------|
| Healthy     | 6.223                  | 4.85                     | 65.237                | 0.536    |
| PDAC        | 11.997                 | 10.088                   | 241.098               | -1.216   |
| Pancreatits | 7.266                  | 6.432                    | 84.160                | 0.453    |

Sup. Table 2: Cox proportional Hazard model for individual models of LipidAge, LAA and CA 19-9 for Progression  
Free Survival

| Covariate                           | Hazard<br>Ratio | 95% CI    | SE   | Z    | p-value |
|-------------------------------------|-----------------|-----------|------|------|---------|
| LipidAge                            | 1.02            | 1.01-1.03 | 0.01 | 3.65 | <0.005  |
| Lipid Age<br>Acceleration           | 1.03            | 1.01-1.05 | 0.01 | 3.72 | <0.005  |
| Binary Lipid<br>Age<br>Acceleration | 1.65            | 1.08-2.50 | 0.21 | 2.38 | 0.02    |
| Log2 CA<br>19-9                     | 1.09            | 1.04-1.13 | 0.02 | 3.96 | <0.005  |
| Binary CA<br>19-9                   | 2.13            | 1.41-3.22 | 0.21 | 3.57 | <0.005  |

Sup. Table 3: Combined model of LAA and Log2 CA 19-9 for Progression Free Survival

| Covariate              | Hazard Ratio | 95% CI    | SE   | Z    | p-value |
|------------------------|--------------|-----------|------|------|---------|
| Lipid Age Acceleration | 1.02         | 1.00-1.04 | 0.01 | 2.20 | 0.03    |
| Log2 CA 19-9           | 1.06         | 1.01-1.11 | 0.02 | 2.42 | 0.02    |

Sup. Table 4: Combined model of binary LAA and binary CA 19-9 for Progression Free Survival

| Covariate                     | Hazard Ratio | 95% CI    | SE   | Z    | p-value |
|-------------------------------|--------------|-----------|------|------|---------|
| Binary Lipid Age Acceleration | 1.56         | 1.03-2.38 | 0.21 | 2.08 | 0.04    |
| Binary CA 19-9                | 2.06         | 1.36-3.12 | 0.21 | 3.39 | <0.005  |
